# Supplementary material
Source: HighWire-hosted journal article supplement (https://www.jneurosci.org/content/38/19/4569)
Supplement: inline-supplementary-material-2 [file inline-supplementary-material-2.docx]

**Figure 3-1: Primer Sequences for ChIP-qPCR**

| **GENE** | **REVERSE** | **FORWARD** |
| --- | --- | --- |
| sh | GGTGGCATGGCCGCCGTTGC | CTCGAGCTGCTCCTTCTGGTG |
| futsch | CTCGCCAAAGCCCACATCACC | GTCACCCTCACACTCAGCTCC |
| dlg | TATTTGCCACCGAACAGGCGTTG | ACCCAAATGGTTGGTCCCGACT |
| dsh | ACCCAGCCGCAACGAGTCAA | AACCGATTGCTGCCGGACAC |
| wg | CCTCCGCTCGAAACGCCGCGA | CGCTGGATCACACGGCAATCATGGG |
| Kcna2 | AGGTCCCAAACACCCTACCA | GATAACGGCCCCAGGAAACA |
| Map1a | AGTACCTCTTTCCAGGAGCC | CAGGGACTCTGCATCTTCAGG |
| Dlg1 | GCAAGGCTAACCTTTGAGCTT | CCCACTGAGGATGTGGCTTT |
| Dvl2 | GCTCTCTTCTAGCTTGTGTCGT | GATGGAGGCCTTGAGTCCC |
